# Supplementary material for: Design Study for an Airborne N 2 O Lidar
Source: Copernicus journal article supplement (doi:10.5194/egusphere-2024-2084), 2024-07-23
Supplement: Supplementary file [file egusphere-2024-2084-RC1-supplement.pdf]

Dear Editor,

August 11, 2024

I have reviewed the manuscript below, which was submitted to the journal *Atmospheric Measurement Techniques*:

“Design Study for an Airborne N<sub>2</sub>O Lidar” by authors Christoph Kiemle, Andreas Fix, Christian Fruck, Gerhard Ehret, and Martin Wirth.

General comments:

The manuscript describes the scientific need for an airborne IPDA lidar to measure N<sub>2</sub>O the atmospheric column below the aircraft. The manuscript infers some initial measurement requirements and shows the results of an initial study to assess suitable spectral regions to measure N<sub>2</sub>O. The authors assess 3 possible spectral regions for the measurement. They use a lidar model to estimate the random error of measurements from notional designs that operate in the 3.9 and 4.5  $\mu\text{m}$  spectral regions. It also gives an overview of possible lasers and detectors for such a lidar and recommends some next steps to improve their suitability for an airborne IPDA lidar.

Recommendation:

This manuscript addresses designing a new type of direct detection IPDA lidar to address an important unmet need for monitoring the atmospheric concentrations of N<sub>2</sub>O, the 3<sup>rd</sup> most important greenhouse gas. It clearly shows the importance of measuring N<sub>2</sub>O, the challenges of previous techniques and the significant benefits of using a lidar to fill this need. The manuscript also includes many relevant references.

The manuscript covers an important new topic and is a good match to the emphasis of this journal. I found that the basics of the manuscript’s concept study appear sound. Nonetheless, I did find a number of areas where the manuscript would benefit from revisions or minor improvements. I therefore recommend accepting the manuscript, but only after recommendations and comments below have been addressed.

Mandatory changes:

1. Page 1 line 13. “best option”. The manuscript actually shows that 4.5  $\mu\text{m}$  is best only in the sense of requiring less laser frequency stability, while the 3.9  $\mu\text{m}$  version has lower measurement error. (See more in comment 22 below). Please change wording to reflect this.
2. Page 1 line 10 The term “terrestrial radiation” is used several places in the manuscript. Do the authors mean thermal emission from the surface? If so then “thermal emission” seems better terminology.
3. Page 2 line 42. Please explain why measurements at dawn dusk or at night may be important.
4. Page 2 line 48. Please add that the strength of signals measured by IPDA lidar is orders of magnitude stronger than atmospheric backscatter signal measured by DIAL.
5. Page 2 line 51. Please add the reference X.Sun et al. AMT, 2021 that shows high measurement accuracy of an airborne Co<sub>2</sub> lidar (in comparison to in situ) in its Figures 7 & 8.
6. Page 2 measurement requirement discussion. Lidar measurement stability (ie lack of drift or changing bias) is very important, particularly for airborne campaigns that fly over different surfaces and atmospheric conditions for hours. Please add an estimate of how stable the airborne lidar measurements need to be to be useful in the example airborne N<sub>2</sub>O sample shown in Eckl 2021, Figure 1b.
7. Page 3, line 75 OD equation. Please add  $\lambda$  (wavelength term) to the OD and sigma terms.

8. Page 3 Line 78. Please add gas number density to the line selection criteria.
9. Figures 1-3. The colors of N<sub>2</sub>O & CH<sub>4</sub> in the plots are similar and hard to differentiate. Please change the color of one of them to clarify.
10. Figures 1& 2. Please add a figure showing an expanded scale of spectral regions & lines in each band recommended for the on & offline wavelengths.
11. Page 5 upper paragraph discussion on-line candidates. Please discuss the laser linewidth requirements for each band and add those to the specification summary in Table 3.
12. Page 6 line 152. Discussion of surface albedo. Since the reflection from water surfaces is specular reflectors (not diffuse like that from land) the strength of their reflected laser signal back to the lidar receiver can vary over orders of magnitude since it depends on factors like surface roughness and off-nadir angle. Since this manuscript primarily addresses measurements over land, I suggest just omitting the mention of water surfaces here.
13. Page 7 Table 2. The thermal emission from the surface is a strong function of temperature. Please give the assumed surface temperature for the calculated emission values.
14. Page 8 Equation 3. For IPDA lidar DAOD is computed from the energies of the transmitted and reference pulses (E), not their optical power (P). This is because the optical power of the pulses varies with time during the pulse, and the peak optical power from the reflected pulse also depends on the range spreading caused by topographic roughness. Please correct the equation.
15. Page 8 Table 8. Please add the assumed values for laser divergence and laser linewidths.
16. Page 9 SNR discussion. Speckle noise can be more significant for laser measurements in the mid-IR since the speckle cell sizes are larger and there are fewer “speckles” (regions of constructive interference) on the detector surface. Please add a discussion about the errors from speckle noise.
17. Page 9 Figure 5. Please explain the cause of the error floors (asymptotes) for the ideal noiseless detector plots shown in Figure 5.
18. Page 11. Detector availability is an important factor when considering which spectral band to use. The results on several MCT detectors reported by by X. Sun et al. in references 2017 & subsequent years all use MCT material that has a cutoff at 4.3  $\mu\text{m}$ . See Figure 2. Although these detectors work well at 3.9  $\mu\text{m}$  but they have little response at 4.5  $\mu\text{m}$ . This should be mentioned.
19. Page 10 laser discussion. Please provide at least one reference for each of the candidate laser approaches mentioned.
20. Page 11. Line 256. Please mention the operating temperature required for superconducting nanowire detectors.
21. Page 11 Line 268. Range precision & short pulses. Amediek et al 2013 showed that m-level range precision was obtained with the CO<sub>2</sub> Sounder lidar that transmitted 1-usec wide rectangular laser pulses. Please update the range precision statement.
22. Page 12 line 278. Which option is preferred depends on many factors including several aspects of laser technology (including availability, complexity, linewidth, frequency locking performance), detector availability, costs, etc. Please revise the preference statement to better reflect the many aspects of the wavelength choice.

Recommended minor edits & wording changes:

1. Page 1 line 8 – the study addresses a lidar to measure atmospheric concentrations, not emissions (which also needs wind speeds). Please revise.
2. Page 1 line 18 Recommend changing “space-proof” to “space”

3. Page 1 line 18. Suggest rewording last sentence to mention that demonstrating airborne lidar has been almost always viewed as a required precursor to space versions.
4. Page 1 line 26. "source" -> sources.
5. Page 2 line 41 "will" -> has the potential to
6. Page 3 line 65. "ideas" -> concepts.
7. Page 6 line 132. "characteristics of both band selections" -> candidate lines in both bands.
8. Figure 4 Please move the labels for "center" and "trough" away from the plot frame.
9. Page 10, line 227. Change "saturation" to attenuation.
10. Page 11 line 249. Detector dynamic range. A linear dynamic range of 2-3 orders of magnitude is quite good. Please delete the word "only".
11. Page 12 line 274. Please restating "design fulfills the measurement requirements" as "provides important new measurement capabilities" or something similar.
